# Supplementary material for: Towards the scaling up of perovskite solar cells and modules
Source: Royal Society of Chemistry journal article supplement (doi:10.1039/c6ta01134a), 2016-01-01
Supplement: c6ta01134a1.pdf [file c6ta01134a1.pdf]

## Supporting Information

### Towards scaling up of perovskite solar cells and modules

Yulia Galagan <sup>1,\*</sup>, Erica W.C. Coenen <sup>2</sup>, Wiljan J.H. Verhees<sup>3</sup>, Ronn Andriessen <sup>1</sup>

*1 - Holst Centre – Solliance, High Tech Campus 21, 5656AE, Eindhoven, the Netherlands*

*2 - TNO Science and Industry, P.O. Box 6235, 5600 HE Eindhoven, the Netherlands*

*3 - ECN – Solliance, High Tech Campus 21, 5656AE, Eindhoven, the Netherlands*

**\*Correspondence:** Holst Centre – Solliance, High Tech Campus 21, 5656AE,  
Eindhoven, the Netherlands

E-mail: [yulia.galagan@tno.nl](mailto:yulia.galagan@tno.nl)

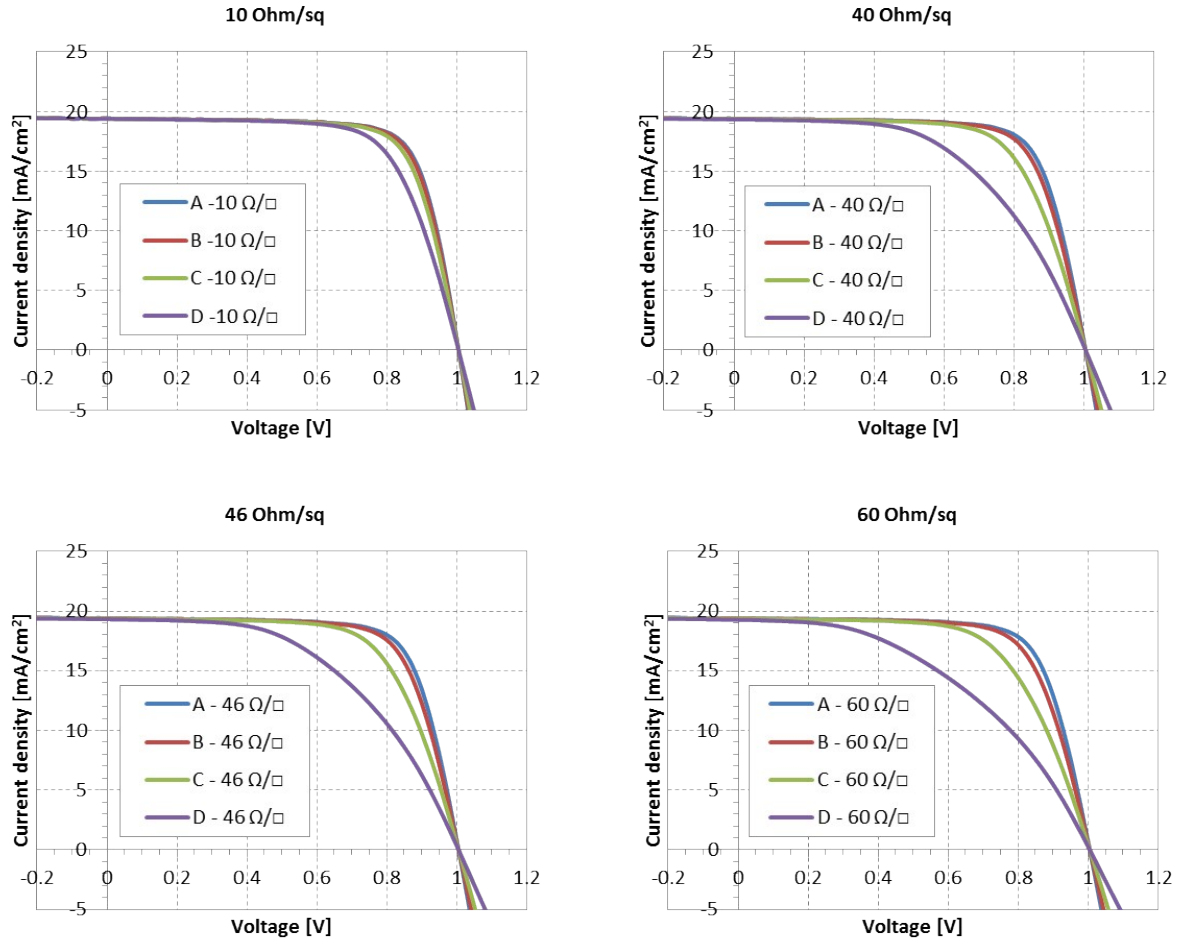

**Figure S1.** Simulated JV-curves of the A, B, C and D cells (ABCD design), with different sheet resistances of the TCO (10, 40 and 60  $\Omega/\square$ ).

**Table S1.** Simulated PV parameters of the PSC devices (ABCD design), with different sheet resistances of the TCO (10, 40 and 60  $\Omega/\square$ ).

| Modeling                      | Jsc<br>[mA/cm <sup>2</sup> ] | Voc<br>[V] | FF<br>[-] | Pmax<br>[mW/cm <sup>2</sup> ] |
|-------------------------------|------------------------------|------------|-----------|-------------------------------|
| A - 10 $\Omega/\square$ (3x3) | 19.424                       | 1.005      | 0.756     | 14.76                         |
| A - 40 $\Omega/\square$ (3x3) | 19.403                       | 1.005      | 0.743     | 14.49                         |
| A - 60 $\Omega/\square$ (3x3) | 19.392                       | 1.005      | 0.733     | 14.29                         |
| B - 10 $\Omega/\square$ (4x4) | 19.418                       | 1.005      | 0.751     | 14.66                         |
| B - 40 $\Omega/\square$ (4x4) | 19.392                       | 1.005      | 0.727     | 14.17                         |

|                                  |        |       |       |       |
|----------------------------------|--------|-------|-------|-------|
| B - 60 $\Omega/\square$ (4x4)    | 19.383 | 1.005 | 0.708 | 13.80 |
| C - 10 $\Omega/\square$ (6x6)    | 19.394 | 1.005 | 0.737 | 14.37 |
| C - 40 $\Omega/\square$ (6x6)    | 19.377 | 1.005 | 0.679 | 13.22 |
| C - 60 $\Omega/\square$ (6x6)    | 19.362 | 1.005 | 0.634 | 12.35 |
| D - 10 $\Omega/\square$ (10x10)  | 19.377 | 1.005 | 0.687 | 13.39 |
| D - 40 $\Omega/\square$ (10x10)  | 19.319 | 1.005 | 0.531 | 10.31 |
| D - 60 $\Omega/\square$ (110x10) | 19.260 | 1.005 | 0.449 | 8.68  |

**Table S2.** Comparison of experimental (a) simulated (b) PV parameters of the PSC devices (ABCD design), where the sheet resistance of the TCO is 46  $\Omega/\square$ .

| <b>a) Experiment</b>            | <b>Jsc</b><br><b>[mA/cm<sup>2</sup>]</b> | <b>Voc</b><br><b>[V]</b> | <b>FF</b><br><b>[-]</b> | <b>Pmax</b><br><b>[mW/cm<sup>2</sup>]</b> |
|---------------------------------|------------------------------------------|--------------------------|-------------------------|-------------------------------------------|
| A - 46 $\Omega/\square$ (3x3)   | 19.43                                    | 1005.04                  | 76.24                   | 14.89                                     |
| B - 46 $\Omega/\square$ (4x4)   | 18.24                                    | 1020.61                  | 73.26                   | 13.64                                     |
| C - 46 $\Omega/\square$ (6x6)   | 19.62                                    | 1032.00                  | 63.76                   | 12.91                                     |
| D - 46 $\Omega/\square$ (10x10) | 19.29                                    | 1046.78                  | 50.66                   | 10.23                                     |

| <b>b) Modeling</b>              | <b>Jsc</b><br><b>[mA/cm<sup>2</sup>]</b> | <b>Voc</b><br><b>[V]</b> | <b>FF</b><br><b>[-]</b> | <b>Pmax</b><br><b>[mW/cm<sup>2</sup>]</b> |
|---------------------------------|------------------------------------------|--------------------------|-------------------------|-------------------------------------------|
| A - 46 $\Omega/\square$ (3x3)   | 19.397                                   | 1.005                    | 0.740                   | 14.429                                    |
| B - 46 $\Omega/\square$ (4x4)   | 19.391                                   | 1.005                    | 0.721                   | 14.060                                    |
| C - 46 $\Omega/\square$ (6x6)   | 19.368                                   | 1.005                    | 0.666                   | 12.956                                    |
| D - 46 $\Omega/\square$ (10x10) | 19.310                                   | 1.005                    | 0.502                   | 9.751                                     |

**Table S3.** Simulated PV parameters of the PSC devices (BS002 design), with different sheet resistances of the TCO (10, 40 and 60  $\Omega/\square$ ).

| <b>Modeling</b> | <b>Jsc</b><br><b>[mA/cm<sup>2</sup>]</b> | <b>Voc</b><br><b>[V]</b> | <b>FF</b><br><b>[-]</b> | <b>Pmax</b><br><b>[mW/cm<sup>2</sup>]</b> |
|-----------------|------------------------------------------|--------------------------|-------------------------|-------------------------------------------|
|-----------------|------------------------------------------|--------------------------|-------------------------|-------------------------------------------|

|                     |       |      |      |       |
|---------------------|-------|------|------|-------|
| Input IV            | 19.43 | 1.01 | 0.76 | 14.89 |
| 13 $\Omega/\square$ | 19.35 | 1.01 | 0.62 | 12.06 |
| 40 $\Omega/\square$ | 19.3  | 1.01 | 0.51 | 9.86  |
| 46 $\Omega/\square$ | 19.29 | 1.01 | 0.49 | 9.49  |
| 60 $\Omega/\square$ | 19.26 | 1.01 | 0.45 | 8.74  |

**Table S4:** Simulated PV parameters of the perovskite modules, with different width of the sub-cells and different sheet resistances of the TCO: (a) 10  $\Omega/\square$ , (b) 40  $\Omega/\square$ , (c) 46  $\Omega/\square$  and (d) 60  $\Omega/\square$ .

a) 10  $\Omega/\square$

| Cell width<br>[mm] | Jsc<br>[mA/cm <sup>2</sup> ] | Voc<br>[V] | FF<br>[-] | Pmax<br>[mW/cm <sup>2</sup> ] |
|--------------------|------------------------------|------------|-----------|-------------------------------|
| 1                  | 13.95                        | 1.01       | 0.76      | 10.71                         |
| 3                  | 17.57                        | 1.01       | 0.76      | 13.38                         |
| 5                  | 18.29                        | 1.01       | 0.75      | 13.72                         |
| 7                  | 18.60                        | 1.01       | 0.73      | 13.61                         |
| 10                 | 18.82                        | 1.00       | 0.69      | 13.01                         |
| 15                 | 18.97                        | 1.01       | 0.59      | 11.23                         |
| 20                 | 18.99                        | 1.01       | 0.48      | 9.09                          |

b) 40  $\Omega/\square$

| Cell width<br>[mm] | Jsc<br>[mA/cm <sup>2</sup> ] | Voc<br>[V] | FF<br>[-] | Pmax<br>[mW/cm <sup>2</sup> ] |
|--------------------|------------------------------|------------|-----------|-------------------------------|
| 1                  | 13.95                        | 1.01       | 0.76      | 10.69                         |
| 3                  | 17.57                        | 1.01       | 0.74      | 13.15                         |
| 5                  | 18.28                        | 1.01       | 0.71      | 13.01                         |
| 7                  | 18.57                        | 1.01       | 0.65      | 12.14                         |
| 10                 | 18.75                        | 1.01       | 0.53      | 10.06                         |
| 15                 | 18.54                        | 1.01       | 0.38      | 7.00                          |

|    |       |      |      |      |
|----|-------|------|------|------|
| 20 | 14.77 | 1.01 | 0.35 | 5.25 |
|----|-------|------|------|------|

c)  $46 \Omega/\square$

| <b>Cell width<br/>[mm]</b> | <b>Jsc<br/>[mA/cm<sup>2</sup>]</b> | <b>Voc<br/>[V]</b> | <b>FF<br/>[-]</b> | <b>Pmax<br/>[mW/cm<sup>2</sup>]</b> |
|----------------------------|------------------------------------|--------------------|-------------------|-------------------------------------|
| 1                          | 13.95                              | 1.01               | 0.76              | 10.68                               |
| 3                          | 17.57                              | 1.01               | 0.74              | 13.10                               |
| 5                          | 18.28                              | 1.01               | 0.70              | 12.84                               |
| 7                          | 18.56                              | 1.01               | 0.63              | 11.82                               |
| 10                         | 18.74                              | 1.01               | 0.51              | 9.52                                |
| 15                         | 17.91                              | 1.01               | 0.36              | 6.53                                |
| 20                         | 13.78                              | 1.01               | 0.35              | 4.89                                |

d)  $60 \Omega/\square$

| <b>Cell width<br/>[mm]</b> | <b>Jsc<br/>[mA/cm<sup>2</sup>]</b> | <b>Voc<br/>[V]</b> | <b>FF<br/>[-]</b> | <b>Pmax<br/>[mW/cm<sup>2</sup>]</b> |
|----------------------------|------------------------------------|--------------------|-------------------|-------------------------------------|
| 1                          | 13.95                              | 1.01               | 0.76              | 10.67                               |
| 3                          | 17.57                              | 1.01               | 0.73              | 12.98                               |
| 5                          | 18.27                              | 1.00               | 0.68              | 12.46                               |
| 7                          | 18.55                              | 1.01               | 0.59              | 11.04                               |
| 10                         | 18.70                              | 1.01               | 0.45              | 8.47                                |
| 15                         | 16.00                              | 1.01               | 0.35              | 5.71                                |
| 20                         | 12.05                              | 1.01               | 0.35              | 4.27                                |
